# Supplementary material
Source: MDPI journal article supplement (https://www.mdpi.com/2071-1050/11/9/2642)

# Visual Assessment Questionnaire-based Survey

Dear Participant, welcome to this online survey on Biophilic design lighting research.

Thank you for agreeing to take part in measuring the visual appearance of plant illumination.

Today, we will be gathering your thoughts and opinions in order to verify our research hypothesis. This survey should only take 10 minutes to complete. Your participation is completely voluntary and all of your responses are anonymous. Be assured your answers will be kept in the strictest of confidentiality and they will only be used for statistical purposes. Thank you in advance for providing your feedback.

Please click next to begin!

**\*Required**

*Skip to question 1.*

## 1.0. General information

### 1. 1a. Gender \*

*Mark only one oval.*

- ☐ Female  
☐ Male

### 2. 1.1b. Age \*

*Mark only one oval.*

- ☐ 21-30  
☐ 31-40  
☐ 40+

### 3. 1.1c. Occupation \*

*Mark only one oval.*

- ☐ Designer  
☐ Architect  
☐ Engineer  
☐ Researcher  
☐ Other: \_\_\_\_\_

### 4. 1.1d. Do you have difficulties distinguishing colours? \*

*Mark only one oval.*

- ☐ Yes  
☐ No

**5. 1.1e. Self-reported eye disease which might impact your visual perception \***

---

**6. 1.1f. Are you wearing glasses? \***

*Mark only one oval.*

☐ Yes

☐ No

**7. 1.1g. Are you wearing contact lenses? \***

*Mark only one oval.*

☐ Yes

☐ No

**8. 1.1h. If yes, do these vision aids filter out part of the light spectrum?**

*Mark only one oval.*

☐ Yes

☐ No

☐ Not applicable

**9. 2.1a. Out of the presented three photographs of illuminated plants, what is your preferred lighting scene? (Please look at the large screen) \***

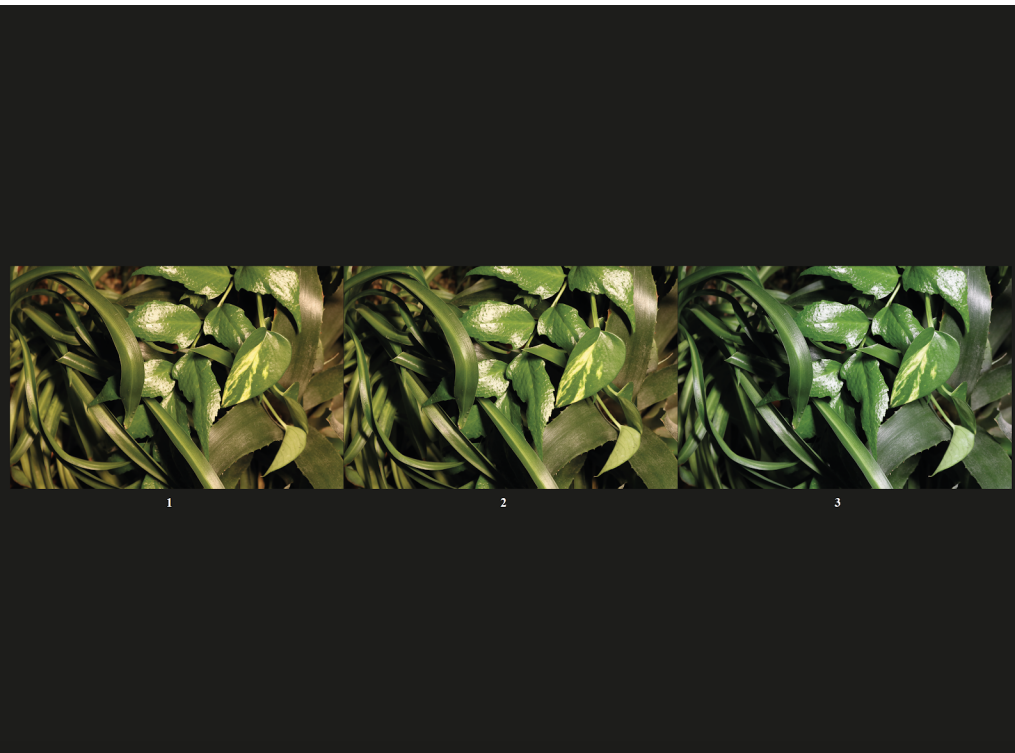

*Mark only one oval.*

☐ Scene 1

☐ Scene 2

☐ Scene 3

**10. 2.1b. Please explain why? \***

---

---

---

---

---

**11. 2.2a. Out of the presented three photographs, the photograph of plant's illumination on the left looks the most natural.***Mark only one oval.*

- ☐ Strongly Disagree
- ☐ Disagree
- ☐ Neutral
- ☐ Agree
- ☐ Strongly Agree

**12. 2.2b. Out of the presented three photographs, the photograph of plant's illumination in the middle looks the most natural. \****Mark only one oval.*

- ☐ Strongly Disagree
- ☐ Disagree
- ☐ Neutral
- ☐ Agree
- ☐ Strongly Agree

**13. 2.2c. Out of the presented three photographs, the photograph of plant's illumination on the right looks the most natural. \****Mark only one oval.*

- ☐ Strongly Disagree
- ☐ Disagree
- ☐ Neutral
- ☐ Agree
- ☐ Strongly Agree

14. 3.1a. Out of the presented six photographs, which of the photograph of coloured plant's illumination is visually appealing and makes the plants looking natural? (Please look at the large screen) \*

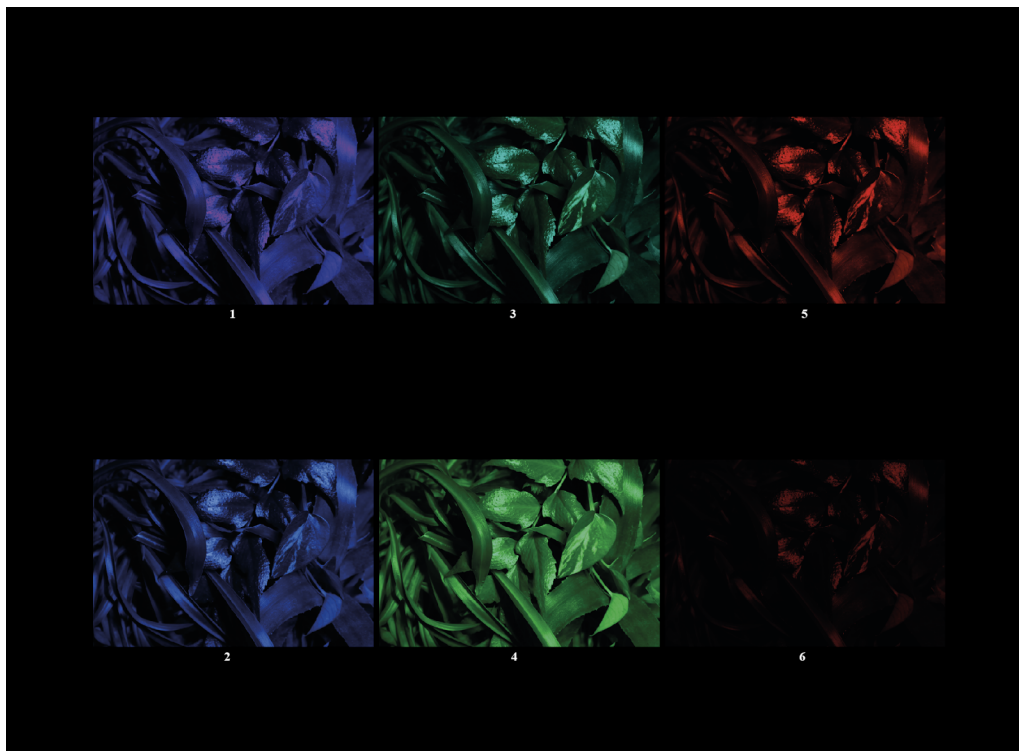

Mark only one oval.

- ☐ Scene 1 - Deep Blue
- ☐ Scene 2 - Blue
- ☐ Scene 3 - Verde
- ☐ Scene 4 - True Green
- ☐ Scene 5 - Hyper Red
- ☐ Scene 6 - Far Red
- ☐ None of them

15. 3.1b. Please explain why? \*

---

---

---

---

---

16. 4.1a. Out of the presented three photographs of illuminated plants, what is your preferred lighting scene? (Please look at the large screen) \*

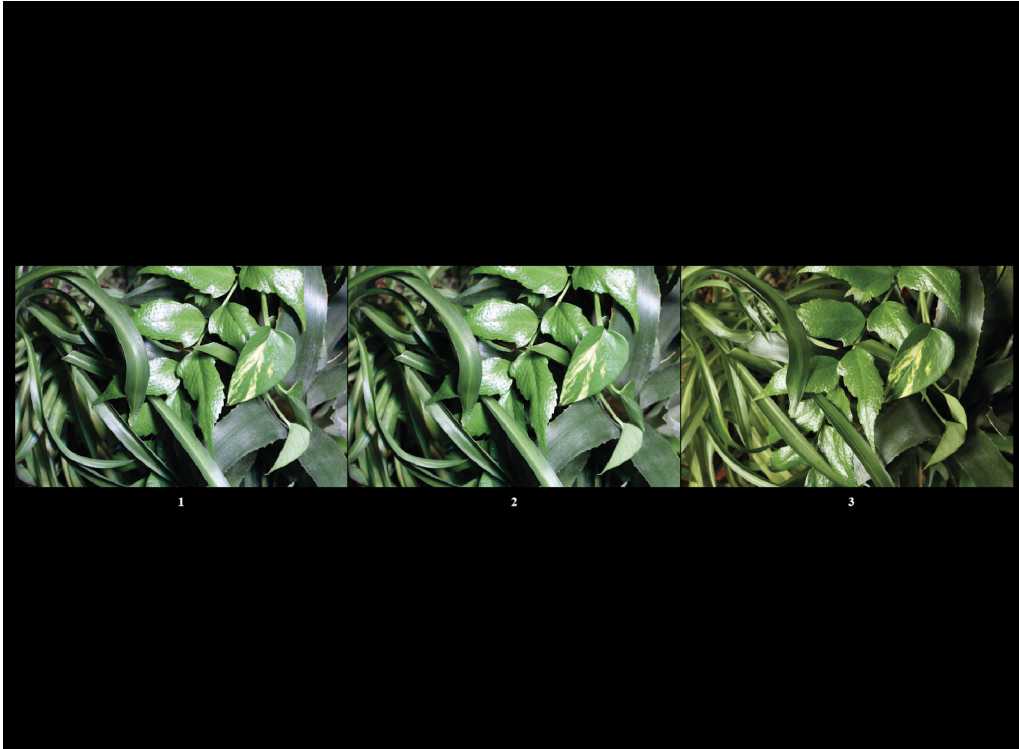

Mark only one oval.

☐ Scene 1

☐ Scene 2

☐ Scene 3

17. 4.1b. Please explain why? \*

---

---

---

---

---

18. **4.2a.** In the middle there is a photograph of plants as they appear in daylight. The photograph of plant's illumination on the left looks most similar to the reference image. (Please look at the large screen) \*

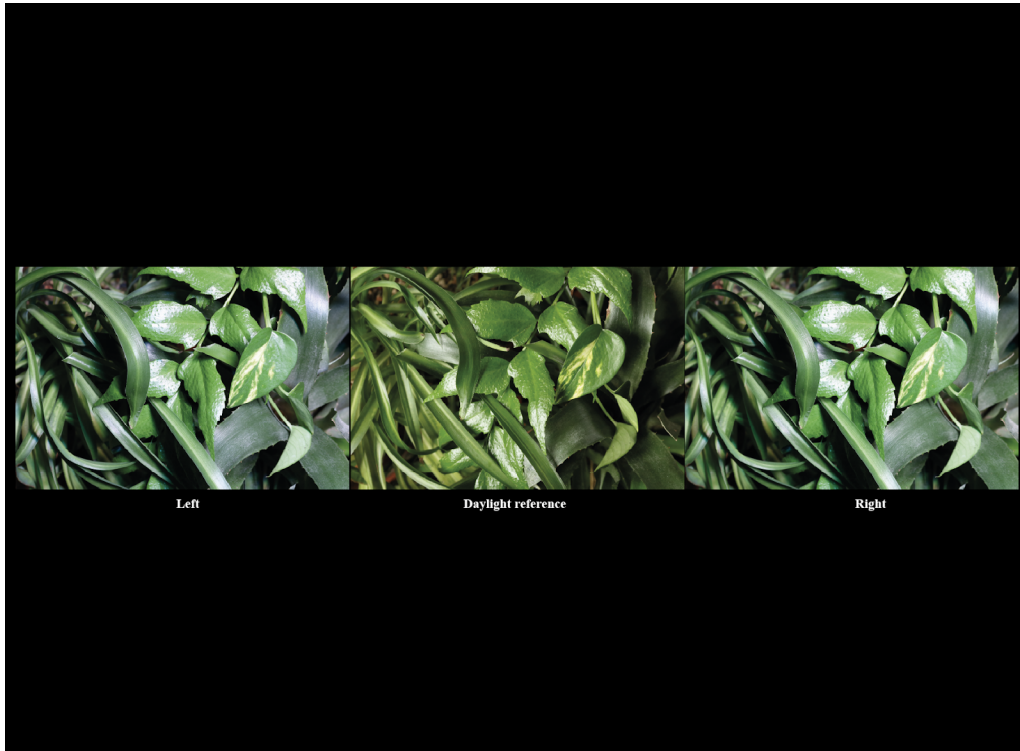

Mark only one oval.

- ☐ Strongly Disagree
- ☐ Disagree
- ☐ Neutral
- ☐ Agree
- ☐ Strongly Agree

19. **4.2b.** Please explain why? \*

---

---

---

---

---

20. **4.3a.** In the middle there is a photograph of plants as they appear in daylight. The photograph of plant's illumination on the right looks most similar to the reference image. (Please look at the large screen) \*



Mark only one oval.

- ☐ Strongly Disagree
- ☐ Disagree
- ☐ Neutral
- ☐ Agree
- ☐ Strongly Agree

21. **4.3b.** Please explain why? \*

---

---

---

---

---

22. **5.1a.** What qualities do you consider important in terms of visual appearance of ornamental plants? \*

---

---

---

---

---

23. **5.2a. Please evaluate the importance of the colour of the plant's leaves for its overall visual appearance \***

*Mark only one oval.*

- ☐ Not important
- ☐ Less important
- ☐ Neutral
- ☐ Quite important
- ☐ Very important

24. **5.2b. Please explain why? \***

---

---

---

---

---

**Thank you very much for participating in our survey!**

We will share the outcome of it in the next months as a part of journal paper.

---

Powered by

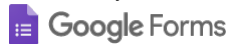

Supplement: s1 [file s1]
